# Supplementary material for: The Impact of Obesity and Adiposity on Mortality Risk in Older Adults: A Ten-year Survival Analysis
Source: Research Square preprint supplement (doi:10.21203/rs.3.rs-777627/v1), 2021-08-18

**The impact of obesity and adiposity on mortality risk in older adults: a ten-year survival analysis**

**Supplementary material**

**Figure 1.** Survival curves for cancer according to three different diagnostic criteria for classifying obesity.


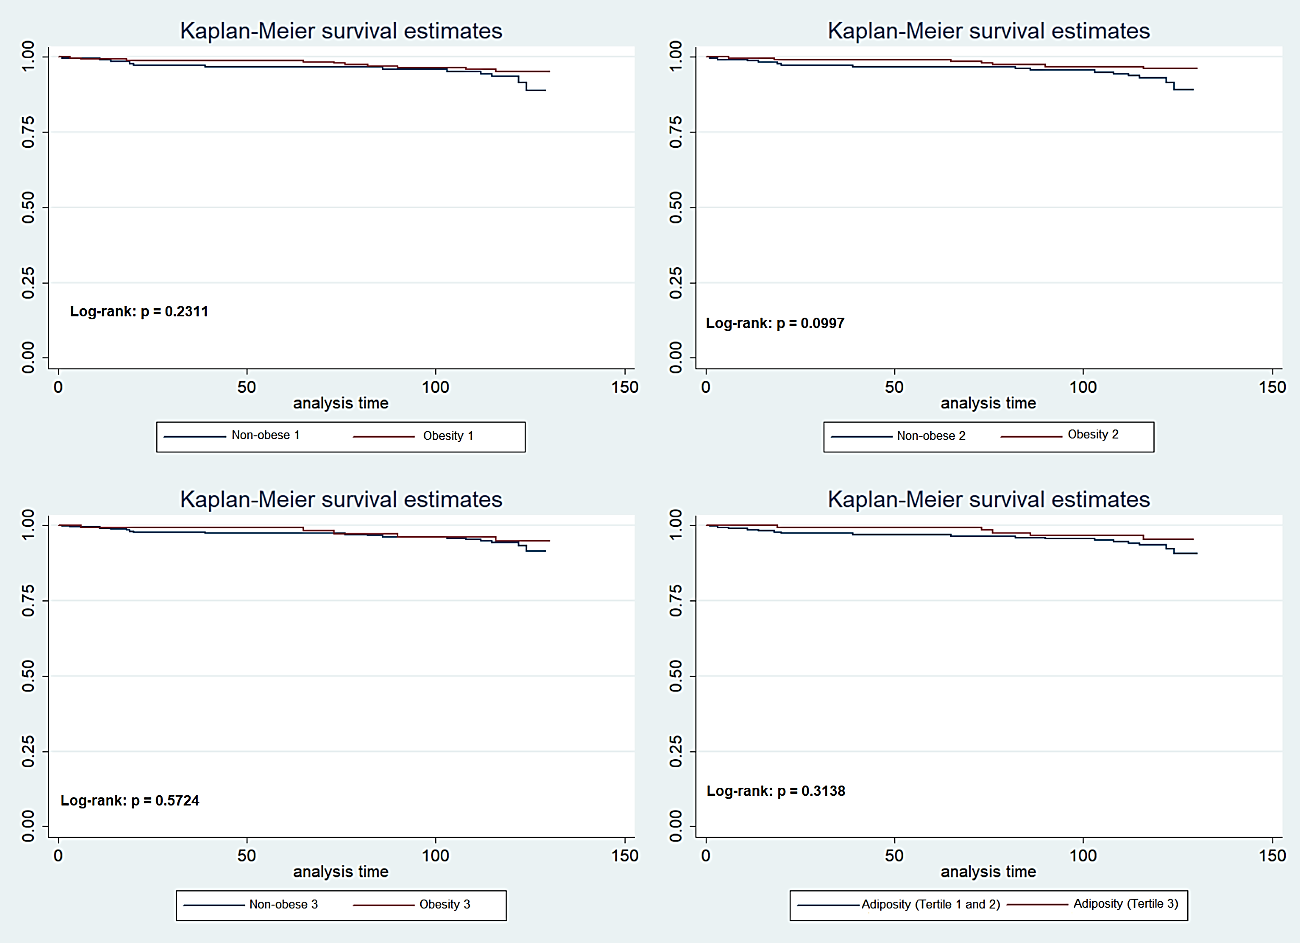


**Figure 2.** Survival curves for CVD according to three different diagnostic criteria for classifying obesity.


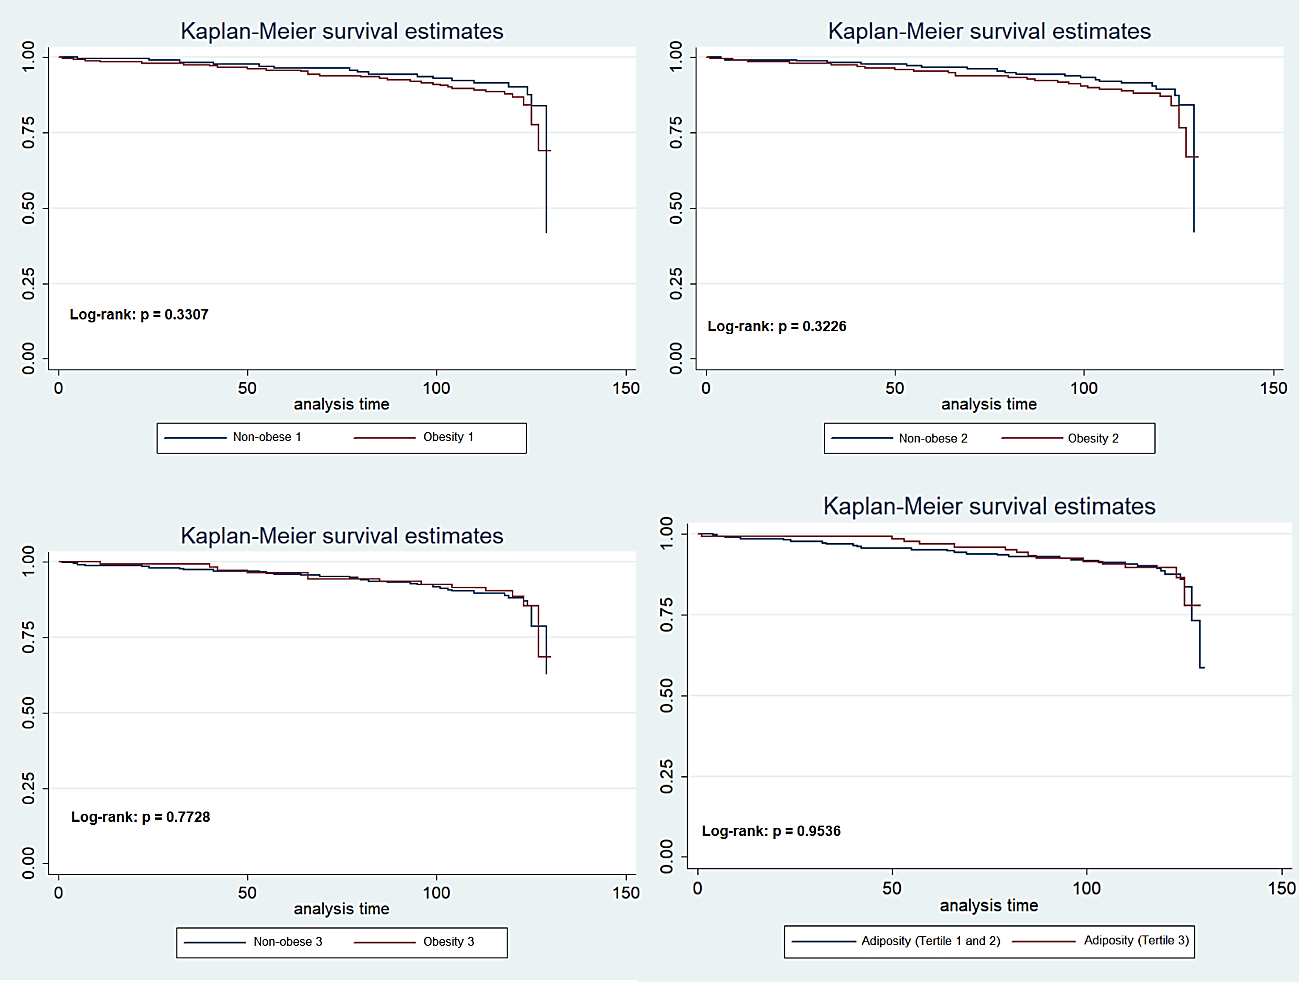

Supplement: Supplementary file 2 [file 8078b00ee0d20de08c18fcfe.docx]
